# Supplementary material
Source: HighWire-hosted journal article supplement (https://www.ajevonline.org/highwire/filestream/9334/field_highwire_adjunct_files/0/7_08-00051_603p312-SuppFig1.pdf)
Supplement: 7_08-00051_603p312-SuppFig1.pdf [file 7_08-00051_603p312-SuppFig1.pdf]

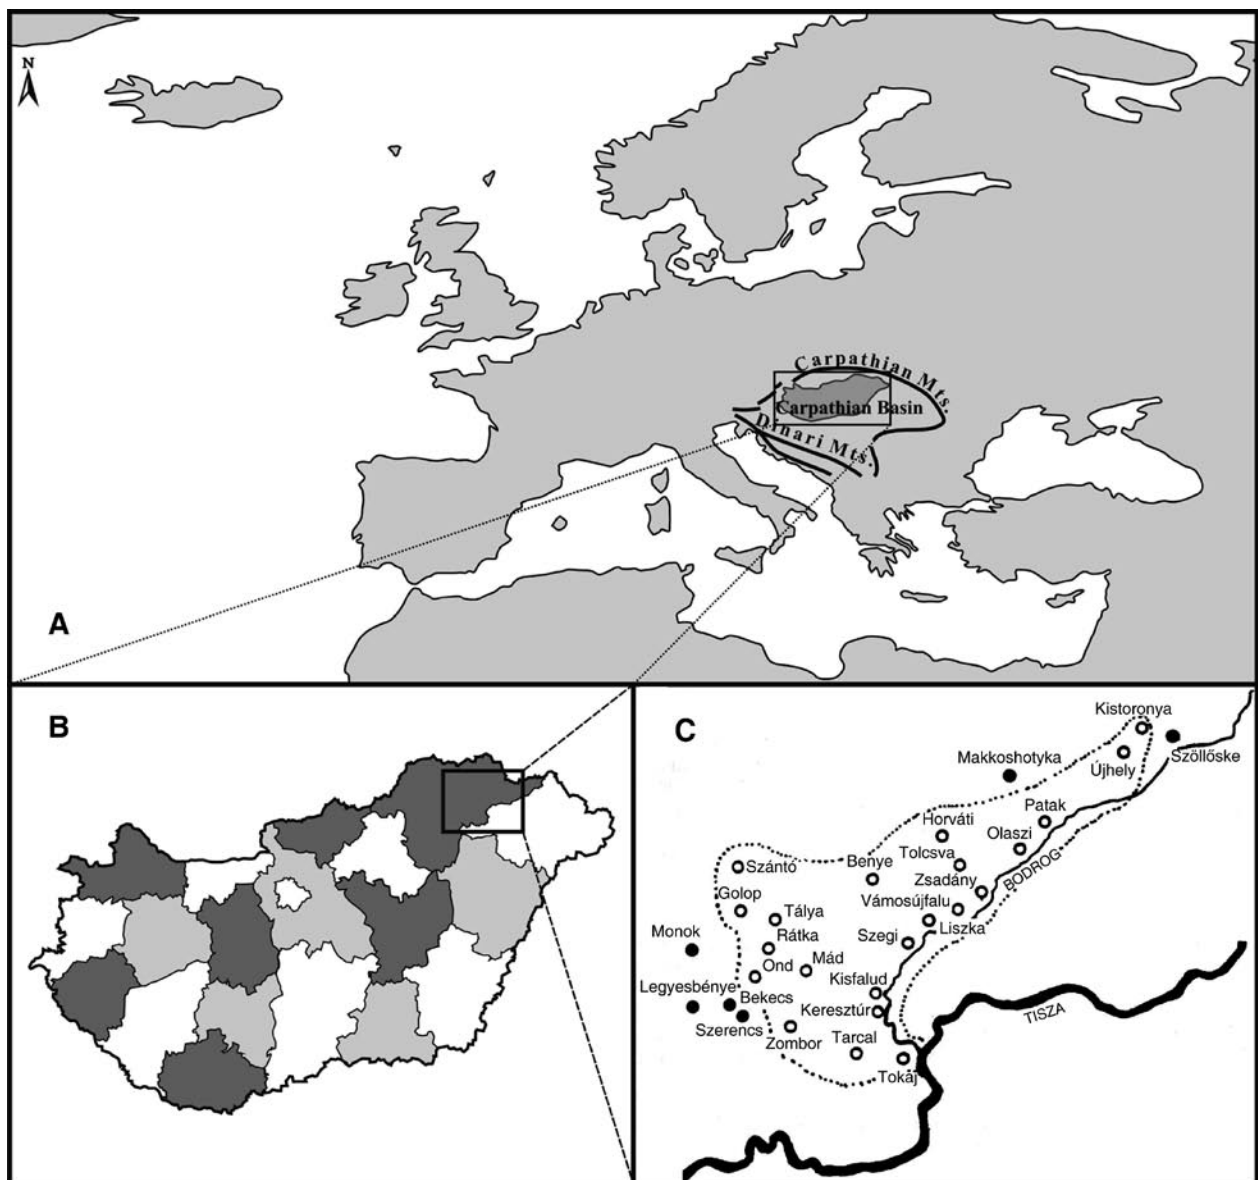

**Supplementary Figure 1** Geographical location of the Carpathian Basin in Europe (A), the wine-growing region of Tokaj in Hungary (B), and the Tokaj region enlarged (C, showing settlements marked in the regal statute of 1737 and settlements belonging to the Tokaj region since the beginning of the 20th century) (Balassa 1991). Tokaj, Szerencs, Újhely, and Patak are small towns. Újhely and Patak are historical names, now called Sátoraljaújhely and Sárospatak, respectively. The remaining 24 settlements are villages. The 6,000 ha of classified vineyard areas of Tokaj-Hegyalja region belong to these 28 settlements. The farthest distance between two points within the region is 52 km. (Panel C is presented with the permission of the Tokaj Kereskedőház Zrt.).
